# Supplementary material
Source: PubMed Central journal article supplement (PMC4237210)
Supplement: NIHMS641304-supplement-Supplemental_Figure_and_legend.pdf [file NIHMS641304-supplement-Supplemental_Figure_and_legend.pdf]

**A**

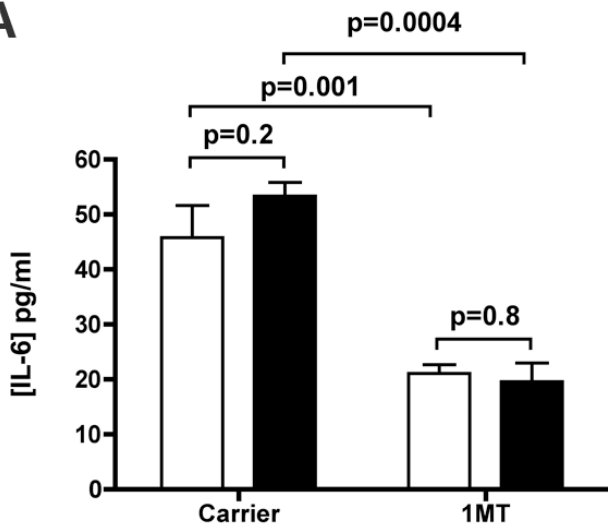

**B**

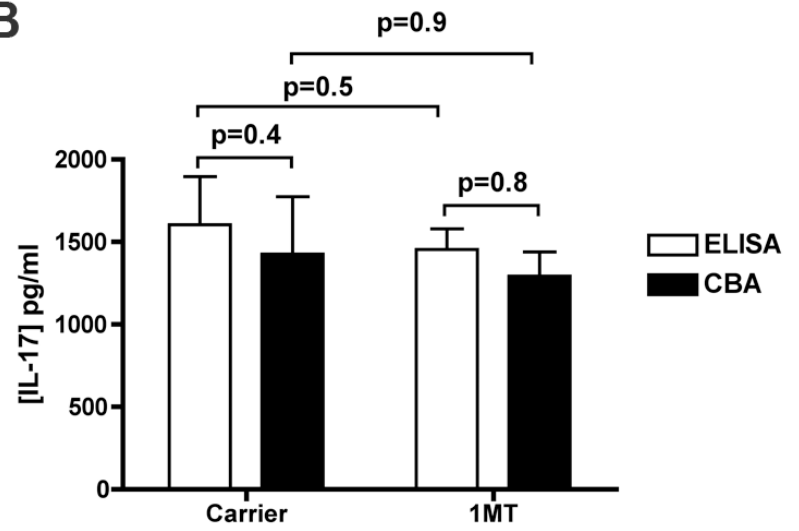

## Supplementary Figure Legend

**Supplementary Figure 1. Level and relative difference of cytokine levels measured with CBA and conventional ELISA.** K/BxN mice were treated with Carrier or 1MT (400mg/kg) from 3-6wk of age. At 6wk, cells from the joint dLNs (popliteal, axillary, and brachial LNs) were harvested and cultured overnight in media alone or PMA (50ng/ml) + ionomycin (500ng/ml). Cytokines were measured in culture supernatants by conventional ELISA and compared to samples from similarly treated mice measured using cytometric bead array. Graphs show the mean concentration  $\pm$  SEM of (A) IL-6 (ELISA: n=10 carrier and n=10 1MT; CBA: n=10 carrier and n=8 1MT) and (B) IL-17 (ELISA: n=7 carrier and n=11 1MT; CBA: n=8 carrier and n=11 1MT), pooled from 2-3 independent experiments for each assay.
